# Supplementary material for: Redox-controlled upper critical solution temperature behaviour of a nitroxide containing polymer in alcohol–water mixtures
Source: Royal Society of Chemistry journal article supplement (doi:10.1039/c5py01864a), 2015-12-18
Supplement: c5py01864a1.pdf [file c5py01864a1.pdf]

## Redox-controlled upper critical solution temperature behaviour of a nitroxide containing polymer in alcohol-water mixtures

### Supplementary Information

Received 00th January 20xx,  
Accepted 00th January 20xx

DOI: 10.1039/x0xx00000x

Olivier Bertrand<sup>a</sup>, Alexandru Vlad<sup>b</sup>, Richard Hoogenboom<sup>c</sup>, Jean-François Gohy<sup>a\*</sup>

www.rsc.org/

## Result and discussion

### Polymer synthesis

**Table S1:** Conditions and results for the polymerisation of TMPM by zero-valent metal mediated RDRP.

| exp <sup>a</sup> | BnBiB/ TMPM<br>(eq.) | t<br>(h) | conv <sup>b</sup><br>(%) | M <sub>n</sub> <sup>b</sup><br>(g/mol) | Đ <sup>c</sup> |
|------------------|----------------------|----------|--------------------------|----------------------------------------|----------------|
| P1               | 1/51                 | 17       | >99.9                    | 16,820                                 | 1.12           |
| P2               | 1/100                | 22       | >99.9                    | 31,550                                 | 1.12           |
| P3               | 1/150                | 22       | 99.5                     | 48,720                                 | 1.12           |

<sup>a</sup> reaction conditions: BnBiB/CuBr<sub>2</sub>/PMDETA = 1/0.05/0.12; Cu(0) wire = 5cm; IPA = 60wt%; T = 40°C.

<sup>b</sup> determined by <sup>1</sup>H NMR spectroscopy in CDCl<sub>3</sub> of the PTMPM

<sup>c</sup> determined by SEC with PMMA standards

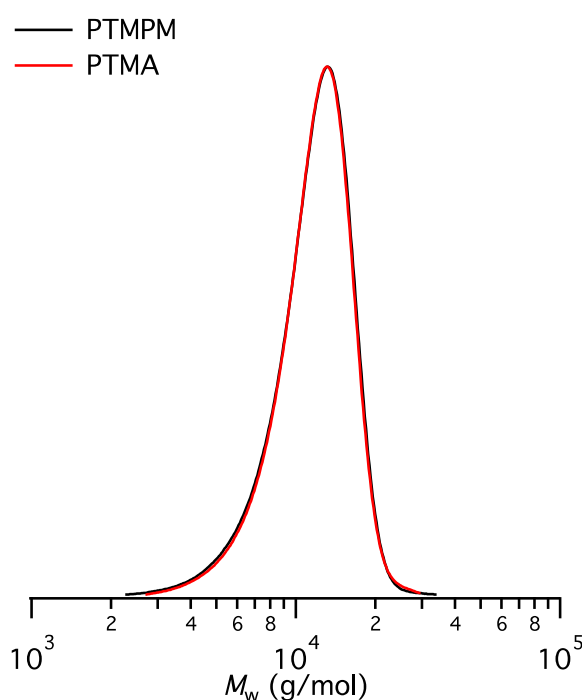

**Figure S1:** Overlay of the SEC chromatograms of PTMPM<sub>69</sub> (black curve) and PTMA<sub>69</sub> (red curve)

## Thermo-responsive properties of PTMA in alcohol/water mixtures

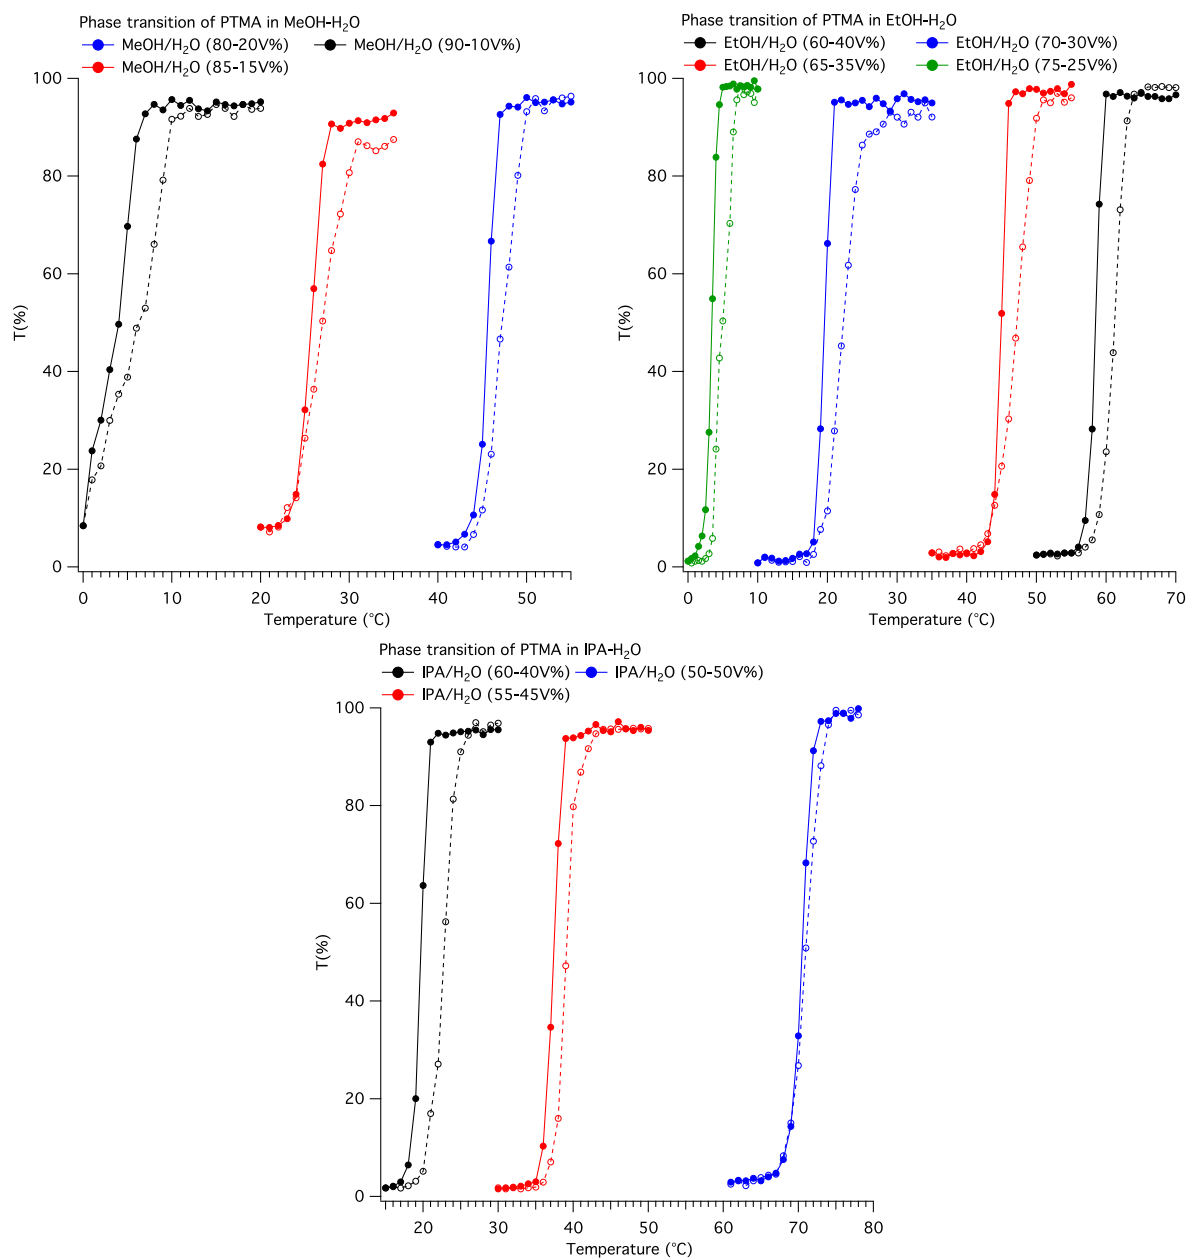

Figure S2: Effect of the alcohol nature and water content on the phase transition of PTMA: (a) methanol, (b) ethanol and (c) isopropanol.

**Table S2:** Effect of the alcohol nature on the T<sub>cp</sub> and T<sub>cph</sub> of PTMA in alcohol-water mixture (C<sub>p1</sub> = 5g/L).

| Solvent | water<br>(vol.-%) | T <sub>cph</sub><br>(°C) | T <sub>cp</sub><br>(°C) |
|---------|-------------------|--------------------------|-------------------------|
| MeOH    | 10                | 7                        | 4                       |
| MeOH    | 15                | 27                       | 25.4                    |
| MeOH    | 20                | 47.1                     | 45.6                    |
| EtOH    | 25                | 4.4                      | 2.8                     |
| EtOH    | 30                | 21                       | 19                      |
| EtOH    | 35                | 47.2                     | 45                      |
| EtOH    | 40                | 61.2                     | 58.1                    |
| IPA     | 40                | 22.6                     | 19.6                    |
| IPA     | 45                | 39                       | 36.5                    |
| IPA     | 50                | 71                       | 70.5                    |

**Table S3:** Effect of the concentration on the T<sub>cp</sub> and T<sub>cph</sub> of PTMA in ethanol-water mixture (P1 in 70-30 vol.-%).

| C <sub>p1</sub><br>(g/L) | T <sub>cph</sub><br>(°C) | T <sub>cp</sub><br>(°C) |
|--------------------------|--------------------------|-------------------------|
| 1                        | 7.4                      | 2.6                     |
| 2.5                      | 13.8                     | 11.8                    |
| 5                        | 21.3                     | 19                      |
| 7.5                      | 26.4                     | 24.2                    |
| 10                       | 27                       | 25.4                    |
| 15                       | 31.8                     | 27.6                    |
| 20                       | 35.9                     | 32.7                    |
| 25                       | 38.8                     | 33.6                    |
| 50                       | 42.6                     | 40.5                    |
| 75                       | 60.6                     | 58.6                    |

**Table S4:** Effect of the PTMA chain length on the T<sub>cp</sub> and T<sub>cph</sub> of PTMA in ethanol-water mixture (C = 5g/L in 70-30 vol.-%).

| Sample | DP  | T <sub>cph</sub><br>(°C) | T <sub>cp</sub><br>(°C) |
|--------|-----|--------------------------|-------------------------|
| P1     | 69  | 22.4                     | 19.5                    |
| P2     | 139 | 55.9                     | 51.6                    |
| P3     | 215 | 65.4                     | 64.2                    |

Equation 1 presents the evolution of the critical temperature ( $T_{cp}$ ) as a function of the polymer chain length ( $DP$ ),  $\vartheta$  is the theta temperature, and  $\psi$  accounts for the sign of the temperature dependence of the Flory-Huggins parameter  $\chi$ :

$$\frac{1}{T_{cp}} = \frac{1}{\theta} + \frac{1}{\theta\psi} \left( \frac{1}{2DP} + \frac{1}{\sqrt{DP}} \right) \quad (\text{equ1})$$

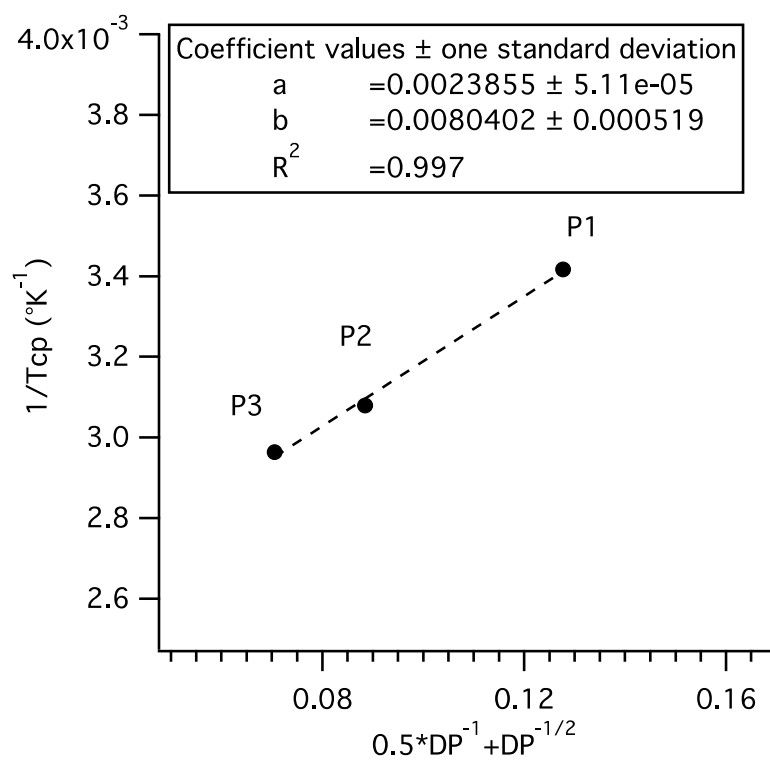

**Figure S3:** Plot of inverse cloud points according to Flory-Huggins theory (eq 1) using the number-average degree of polymerization  $DP$ .

## Redox tuning of the UCST

Table S5: Effect of the chemical oxidation of the PTMA in ethanol-water mixture ( $C_{p1} = 5\text{g/L}$ ; 60-40 vol.-%;  $T = 70^\circ\text{C}$ ).

| TEMPO/NaClO<br>(eq.) | t<br>(d) | T <sub>cp</sub><br>(°C) | T <sub>cp</sub><br>(°C) |
|----------------------|----------|-------------------------|-------------------------|
| 1/0                  | 0        | 61.2                    | 58.1                    |
| 1/2                  | 0        | 60.6                    | 59.7                    |
| 1/2                  | 1        | 56                      | 53.1                    |
| 1/2                  | 2        | 45.7                    | 44.2                    |
| 1/2                  | 7        | 44.2                    | 41.7                    |

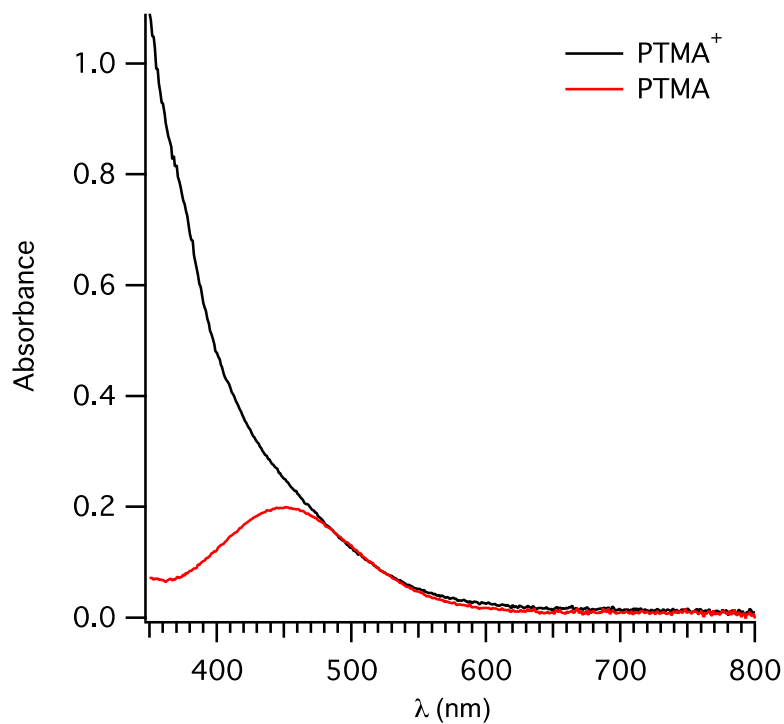Figure S4: overlay of the UV-Vis spectra of a solution of PTMA (red curve) and oxidised PTMA (black curve) in ethanol-water mixture at  $70^\circ\text{C}$  ( $C_{PTMA} = 5\text{g/L}$ ; in 60-40 vol.-%).

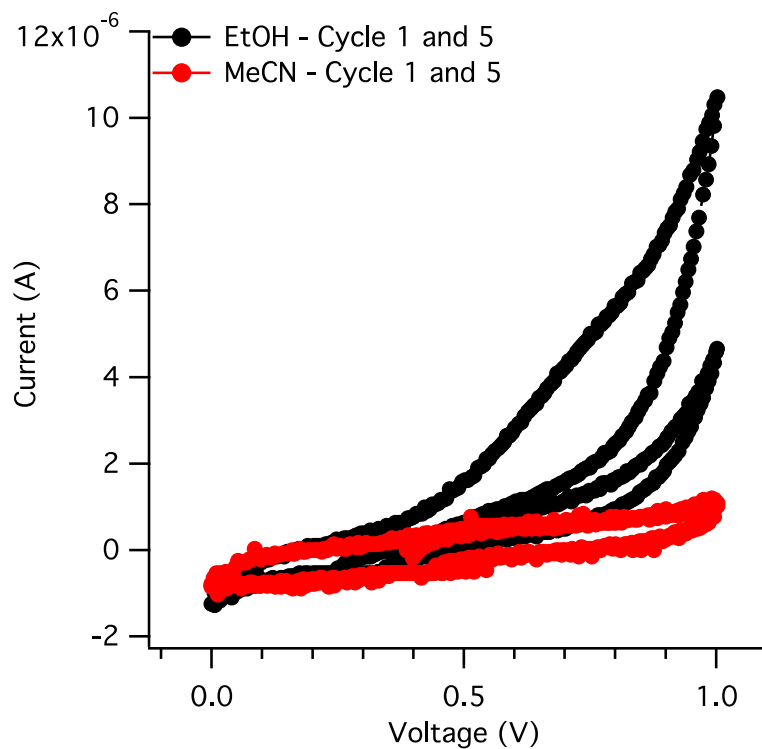

**Figure S5:** Cyclic voltammetry of a solution of  $\text{LiClO}_4$  in acetonitrile (red curve) and ethanol (black curve) at  $50 \text{ mV s}^{-1}$  (cycles 1 and 5;  $0.1 \text{ M LiClO}_4$ ).

**Table S6:** Effect of the electrochemical oxidation of the PTMA in ethanol-water mixture ( $C_{\text{PTMA}} = 5 \text{ g/L}$ ;  $0.01 \text{ M}$  of  $\text{LiClO}_4$  in 60-40 vol.-%).

| Nature of the PTMA | Cycle        | Applied voltage (V) | t (h) | T <sub>cph</sub> (°C) | T <sub>cp</sub> (°C) |
|--------------------|--------------|---------------------|-------|-----------------------|----------------------|
| PTMA               |              | 0                   | 0     | 58.5                  | 55.4                 |
| PTMA <sup>+</sup>  | Oxidation C1 | 0.8                 | 5     | 27.4                  | 25.2                 |
| PTMA               | Reduction C1 | 0.1                 | 5     | 45.3                  | 44.1                 |
| PTMA <sup>+</sup>  | Oxidation C2 | 0.8                 | 4     | 29.1                  | 27                   |
| PTMA               | Reduction C2 | 0.1                 | 5     | 45.1                  | 43.3                 |
